# Supplementary material for: Bit Error Rate Analysis of TSVD-Based mMIMO Detection Techniques over Correlated Rician Fading Channel using Dynamic Threshold
Source: Research Square preprint supplement (doi:10.21203/rs.3.rs-6200640/v1), 2025-04-24
Supplement: Supplementary file 1 [file 37c04f279a2471c2eed308ce.docx]

**Table 1** Detection complexity of linear detection techniques

| **Detection technique** | **Complexity** |
| --- | --- |
| MMSE and ZF using Cholesky and QR decompositions[19, 20, 43] |  |
| Direct pseudo-inverse utilizing QR decomposition[19, 20] |  |
| *TSVD-based ZF employing randomized schemes[44-46] | ) |
| *TSVD-based direct pseudo-inverse utilizing randomized schemes[44-46] | ) |
