# Supplementary material for: Bit Error Rate Analysis of TSVD-Based mMIMO Detection Techniques over Correlated Rician Fading Channel using Dynamic Threshold
Source: Research Square preprint supplement (doi:10.21203/rs.3.rs-6200640/v1), 2025-04-24
Supplement: Supplementary file 2 [file c2efe54627332e599aec4757.docx]

**Table 2** Simulation parameters

| **Simulation Parameter** | **Range or Type** |
| --- | --- |
| Decomposition algorithms | TSVD, QR and Cholesky |
| Fading channel | Rician |
| Rician factor () | 5 dB - 25 dB |
| Channel Noise | AWGN |
| Transmitting antenna number per user () | 4 |
| Load factor () | 0.5, 0.64, 0.8 and 1 |
| Total number of receiving antennas () | 32, 40, 50, 64, 80, 100, 128, 160, 200, 256, 300, 400, 512 |
| Total number of users () | 8, 16, 32 and 64 |
| Average received SNR () | 0 to 60 dB |
| Order of the QAM | 4, 16 |
| Monte Carlo simulation count | 106 |
| Correlation coefficient ( and) | 0 to 0.9 |
